# Supplementary material for: Genome-wide mutation profiles of colorectal tumors and associated liver metastases at the exome and transcriptome levels
Source: PubMed Central journal article supplement (PMC4673155; doi:10.18632/oncotarget.4246), 2015-06-01
Supplement: oncotarget-06-22179-s001.pdf [file oncotarget-06-22179-s001.pdf]

## SUPPLEMENTARY FIGURES AND TABLES

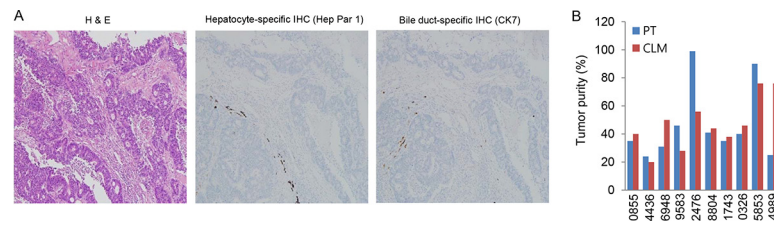

**Supplementary Figure S1: A. Representative images for histological examination of tumor cell contents in a CLM tissue ( $\times 100$  magnified images).** Immunohistochemistry revealed the low amounts of normal hepatocytes and bile duct cells, indicating the high tumor purity. Left, Hematoxylin and eosin stain; Middle, hepatocyte-specific immunohistochemistry (staining by Hep Par 1 antibody), Right, bile duct-specific immunohistochemistry (staining by CK7 antibody). **B.** Tumor purity estimated mathematically using ASCAT v2.1. Tumor purity of several samples, which was unable to be analyzed using ASCAT v2.1, was excluded.

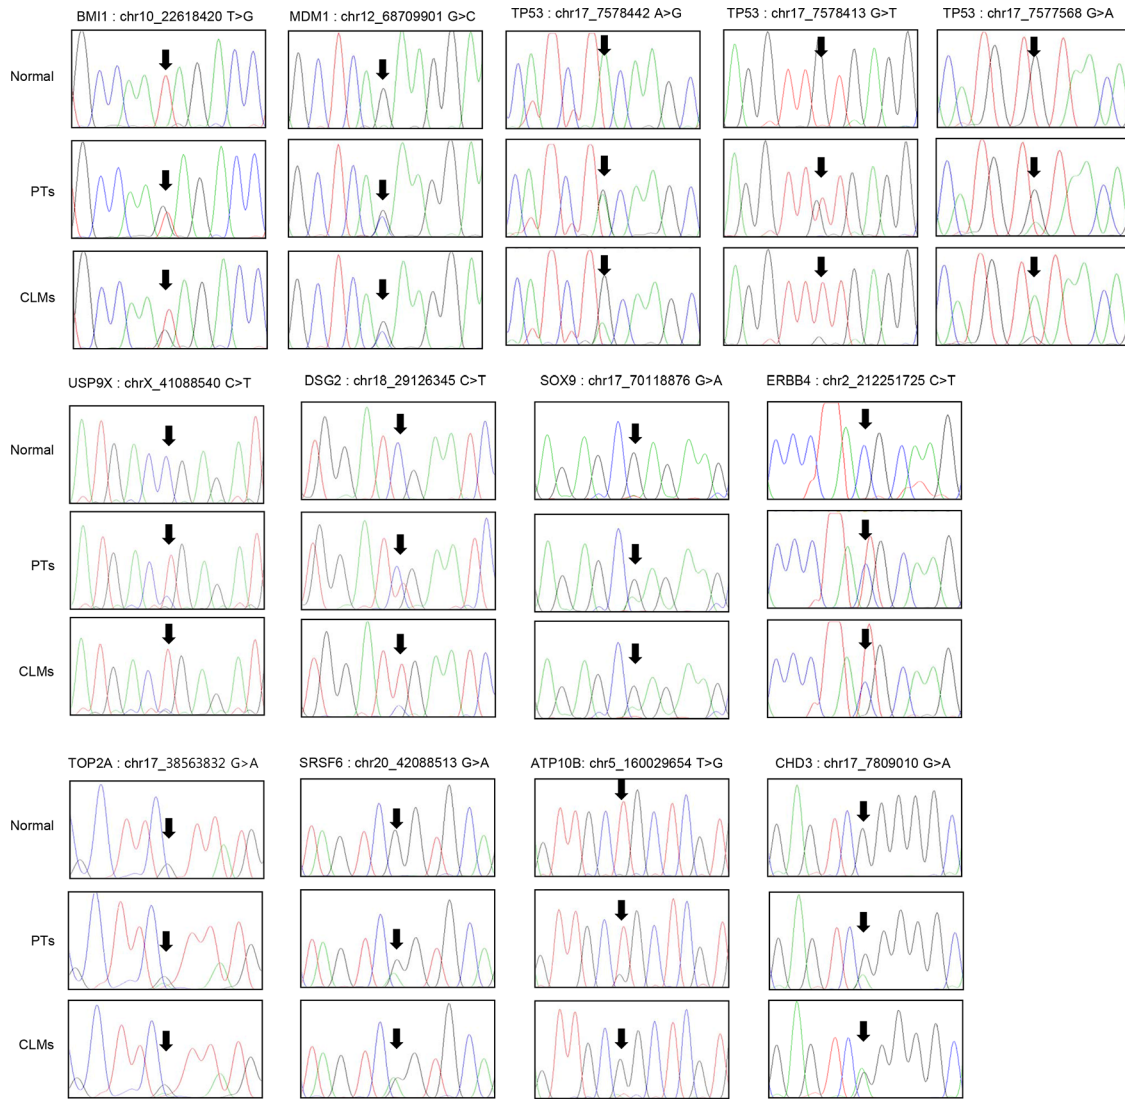

Supplementary Figure S2: Validation of somatic mutations by Sanger sequencing.

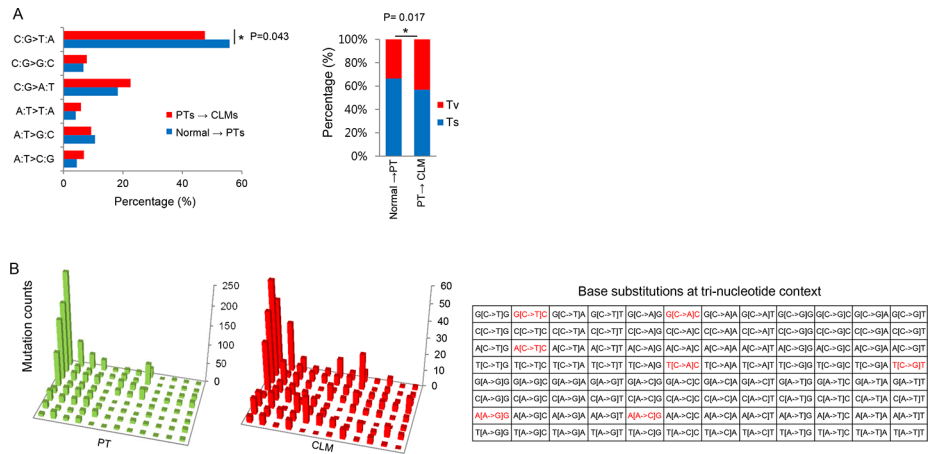

**Supplementary Figure S3: Molecular patterns identified in CRC patients with CLMs.** **A.** Percentage of base substitutions (left), and proportion of transversion (Tv) and transition (Ts) mutations (right) analyzed using exome-seq data from publicly available independent CRC patients. **B.** 96 base substitutions identified in 19 CRC patients with CLM.

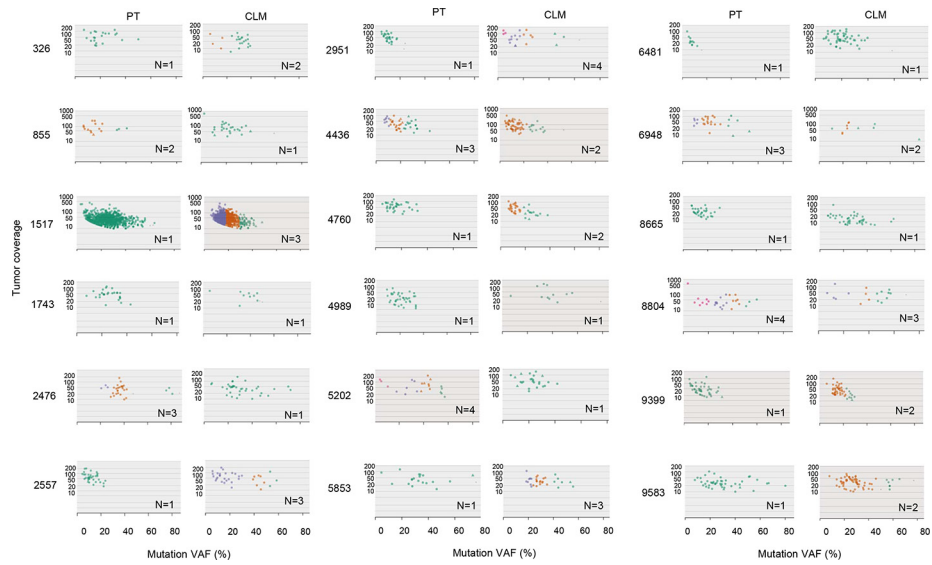

**Supplementary Figure S4: The Clonality of PTs and CLMs analyzed by SciClone.** Mutations that are located within genomic loci with copy number 2 were used to analyze clonality. Number N indicates the analyzed clonal count of each sample. Different colors indicate clusters of clones.

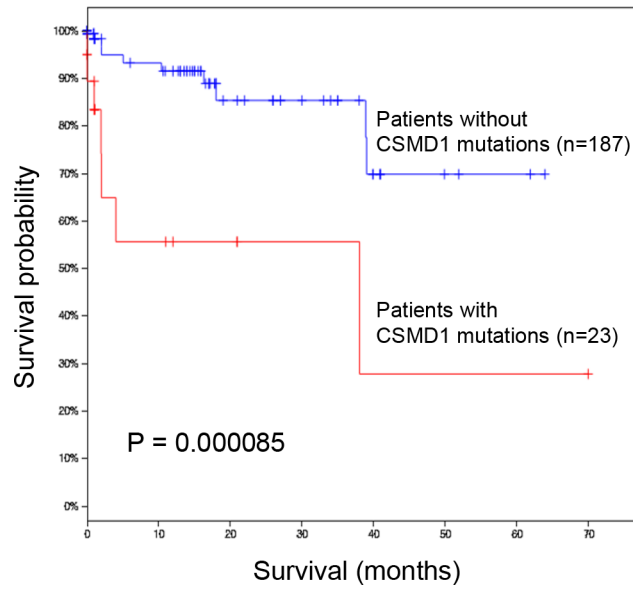

**Supplementary Figure S5: A Kaplan-Meier survival curve analyzed according to the absence or presence of mutations in *CSMD1* using the TCGA CRC dataset. Log rank *P*-value is shown.**

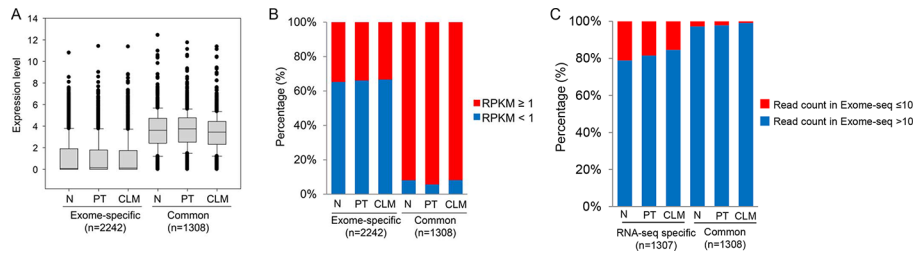

**Supplementary Figure S6: A, B. The expression level of genes harboring exome-seq specific or common mutations (mutations overlapped in exome-seq and RNA-seq data). C. Read depth of RNA-seq specific or common mutations in exome-seq.**

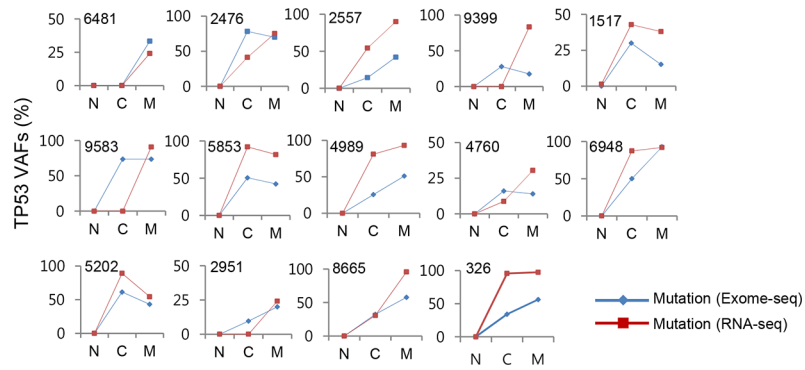

Supplementary Figure S7: The VAFs of *TP53* mutations in exomes and transcriptomes of normal (N), PTs (C), and CLMs (M).

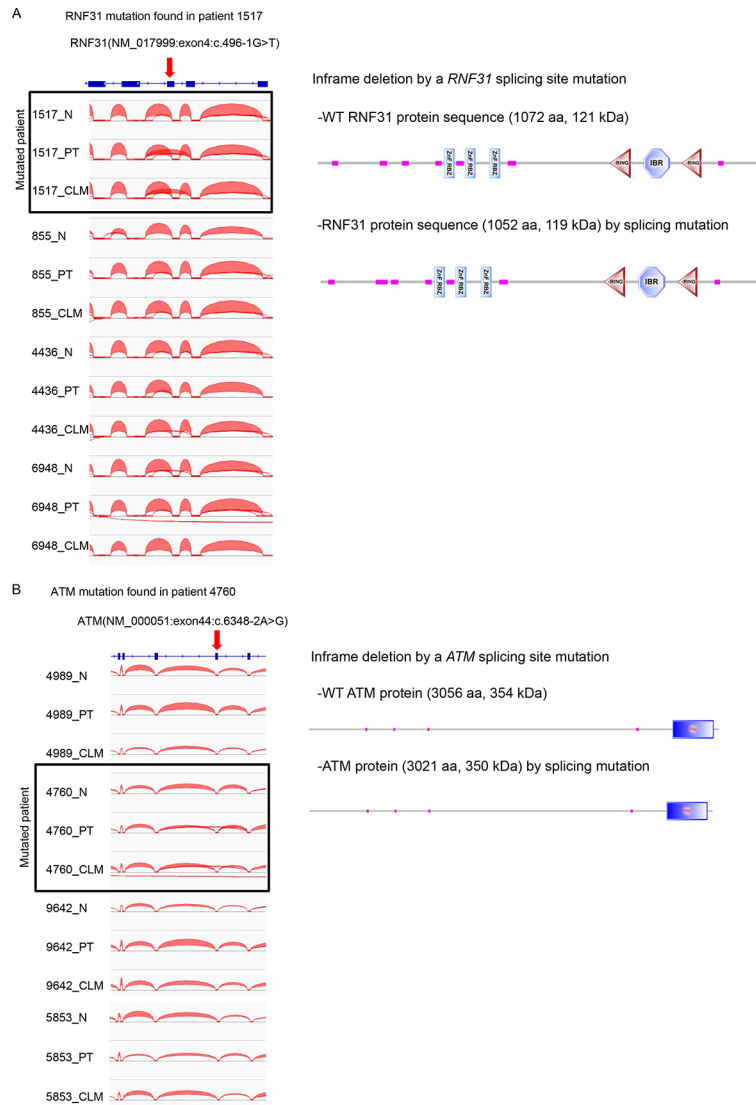

**Supplementary Figure S8: Mutation-dependent splicing events in CRCs.** A. Exon 4 skipping by a *RNF31* splice site mutation in patient 1517. B. Exon 44 skipping by an *ATM* splice site mutation in patient 4760.



**Supplementary Table S1: Clinical information of 19 CRC patients with CLMs.**

**Supplementary Table S2: sSNVs identified from 19 CRC patients with CLMs.**

**Supplementary Table S3: Insertion-deletion mutations identified from 19 CRC patients with CLMs.**

**Supplementary Table S4: Somatic mutations identified from RNA-seq of 19 CRC patients with CLMs.**

**Supplementary Table S5: Three classification mutations identified in 19 CRC patients with CLMs.**

**Supplementary Table S6: Biological processes overrepresented in three classification mutations.**

**Supplementary Table S7: Somatic mutations exhibiting differential VAFs between exome and transcriptome.**

**Supplementary Table S8: Splice site mutations found in 19 CRC patients with CLMs.**

**Supplementary Table S9: Primers for Sanger sequencing.**
